# Supplementary material for: Demographic causes of adult sex ratio variation and their consequences for parental cooperation
Source: PubMed Central journal article supplement (PMC5917032; doi:10.1038/s41467-018-03833-5), 2018-04-25
Supplement: 41467_2018_3833_MOESM1_ESM.pdf [file 41467_2018_3833_MOESM1_ESM.pdf]

Demographic causes of adult sex ratio variation and their consequences for  
parental cooperation

Eberhart-Phillips et al.

**Supplementary Information**

**Supplementary Table 1. Study site metadata: geographic location (see Fig. 1) and duration of monitoring effort.**

| <b>Species</b>         | <b>Population</b> | <b>Latitude</b> | <b>Longitude</b> | <b>Years monitored</b> |
|------------------------|-------------------|-----------------|------------------|------------------------|
| <i>C. nivosus</i>      | Mexico            | 23°54'N         | 106°57'W         | 2006-2012              |
| <i>C. alexandrinus</i> | Turkey            | 36°43'N         | 35°03'E          | 1996-2001              |
|                        | Cape Verde        | 15°8'N          | 23°13'W          | 2007-2015              |
| <i>C. thoracicus</i>   | Madagascar        | 22°6'S          | 43°15'E          | 2009-2015              |
| <i>C. marginatus</i>   | Madagascar        |                 |                  | 2009-2015              |
| <i>C. pecuarius</i>    | Madagascar        |                 |                  | 2009-2015              |
|                        |                   |                 |                  | 43 years               |

**Supplementary Table 2. Summary of parental care sex roles.** Percentages reflect the within-population proportion of families with a given parental care system.

| <b>Species</b>         | <b>Population</b> | <b>Bi-parental<br/>[95% CI]</b> | <b>Female-only care<br/>[95% CI]</b> | <b>Male-only care<br/>[95% CI]</b> | <b><i>n</i></b> |
|------------------------|-------------------|---------------------------------|--------------------------------------|------------------------------------|-----------------|
| <i>C. nivosus</i>      | Mexico            | 9% [5, 14]                      | 1% [0, 6]                            | 90% [85, 94]                       | 125             |
| <i>C. alexandrinus</i> | Turkey            | 50% [40, 62]                    | 9% [0, 21]                           | 41% [31, 53]                       | 78              |
|                        | Cape Verde        | 71% [64, 77]                    | 15% [9, 22]                          | 14% [8, 21]                        | 170             |
| <i>C. thoracicus</i>   | Madagascar        | 93% [86, 100]                   | 0% [0, 12]                           | 7% [0, 36]                         | 14              |
| <i>C. marginatus</i>   | Madagascar        | 96% [91, 100]                   | 4% [0, 12]                           | 0% [0, 7]                          | 23              |
| <i>C. pecuarius</i>    | Madagascar        | 0% [0, 10]                      | 20% [11, 30]                         | 80% [72, 91]                       | 61              |
|                        |                   |                                 |                                      |                                    | 471             |

**Supplementary Table 3. Summary of hatching sex ratio data**, where  $\rho$  is the average hatching sex ratio (expressed as the proportion of hatchlings in a brood that are male) and 95% CIs are calculated using a binomial distribution.

| <b>Species</b>         | <b>Population</b> | $N_{\text{Families}}$ | $N_{\text{Hatchlings}}$ | $\rho$ | <b>95% CI</b>  |
|------------------------|-------------------|-----------------------|-------------------------|--------|----------------|
| <i>C. nivosus</i>      | Mexico            | 198                   | 484                     | 0.469  | [0.425, 0.514] |
| <i>C. alexandrinus</i> | Turkey            | 102                   | 262                     | 0.508  | [0.447, 0.568] |
|                        | Cape Verde        | 107                   | 197                     | 0.477  | [0.408, 0.547] |
| <i>C. thoracicus</i>   | Madagascar        | 11                    | 22                      | 0.636  | [0.423, 0.807] |
| <i>C. marginatus</i>   | Madagascar        | 13                    | 30                      | 0.600  | [0.419, 0.757] |
| <i>C. pecuarius</i>    | Madagascar        | 72                    | 144                     | 0.528  | [0.446, 0.757] |

**Supplementary Table 4. Sample size and over-dispersion summary of mark-recapture dataset used to estimate apparent survival.**

| Species                | Population | Juveniles <sup>‡</sup> |     | Adults <sup>†</sup> |     | Total individuals | Median $\hat{c}$ |
|------------------------|------------|------------------------|-----|---------------------|-----|-------------------|------------------|
|                        |            | ♀                      | ♂   | ♀                   | ♂   |                   |                  |
| <i>C. nivosus</i>      | Mexico     | 438                    | 388 | 221                 | 212 | 1358              | 1.70             |
| <i>C. alexandrinus</i> | Turkey     | 310                    | 293 | 557                 | 504 | 1664              | 1.49             |
|                        | Cape Verde | 377                    | 383 | 254                 | 213 | 1227              | 1.37             |
| <i>C. thoracicus</i>   | Madagascar | 38                     | 56  | 83                  | 68  | 245               | 2.72             |
| <i>C. marginatus</i>   | Madagascar | 76                     | 96  | 99                  | 95  | 366               | 1.31             |
| <i>C. pecuarius</i>    | Madagascar | 274                    | 286 | 382                 | 416 | 1358              | 1.77             |
|                        |            |                        |     |                     |     | 6119              |                  |

<sup>‡</sup>Individuals first marked as hatchlings (i.e. known age).

<sup>†</sup>Individuals first marked as breeding adults (i.e. 1+ years old).

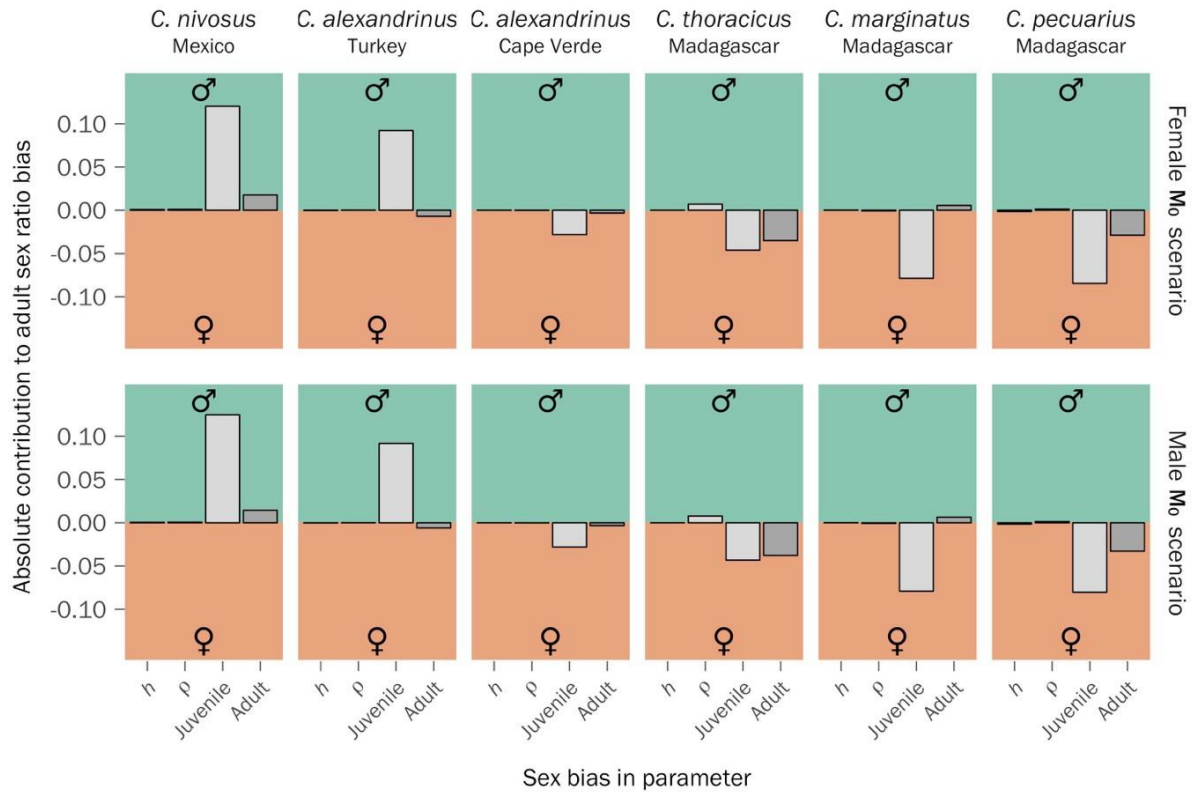

**Supplementary Figure 1. Contributions of sex-specific parameters to adult sex ratio**

**bias.** These results are based on a life-table response experiment (LTRE) that compared the empirically-derived sex-specific model to null scenarios with no sex differences in demographic rates (top panel:  $\mathbf{M}_0$  consists of female rates, bottom panel:  $\mathbf{M}_0$  consists of male rates; Eq. 8) and a monogamous mating system (i.e.  $h = 1$ ). Because ASR is measured as the proportion of the adult population that is male, LTRE statistics are negative for demographic rates that are female-biased in each population. Notation:  $h$  = mating system index (Eq. 6),  $\rho$  = hatching sex ratio, Juvenile = sex-biased apparent survival of juveniles, Adult = sex-biased apparent survival of adults.

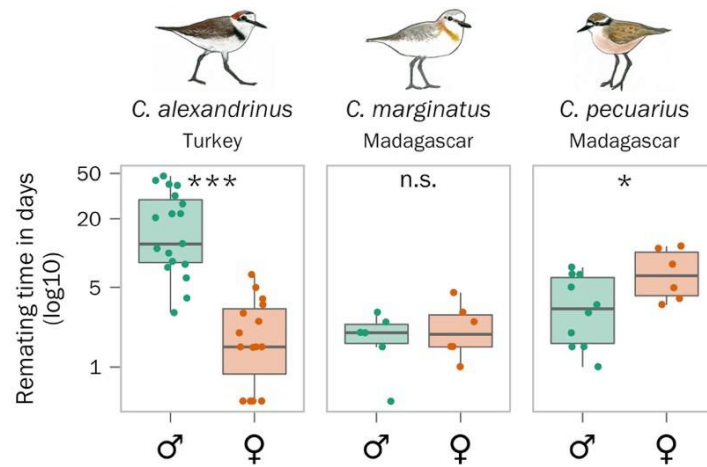

**Supplementary Figure 2. Interspecific variation in sex-specific mating opportunities**

**among three plover species.** Experimental assessment of sex-differences in remating times in three of the six populations analysed indicate that *C. alexandrinus* males in Tuzla, Turkey ( $n = 19$ ) take longer to find a mate than females ( $n = 15$ ) after induced divorce. This trend is reversed in *C. pecuarius* ( $n_{\text{♂}} = 10$ ,  $n_{\text{♀}} = 6$ ) whereas there are no differences in the *C. marginatus* ( $n_{\text{♂}} = 6$ ,  $n_{\text{♀}} = 6$ ). Significant sex-differences are indicated by asterisks (\*\*\*:  $P < 0.001$ , \*:  $P < 0.05$ , n.s.:  $P > 0.05$ ). Figure adapted from Parra et al.<sup>1</sup>. Original plover illustrations by L.J.E-P.

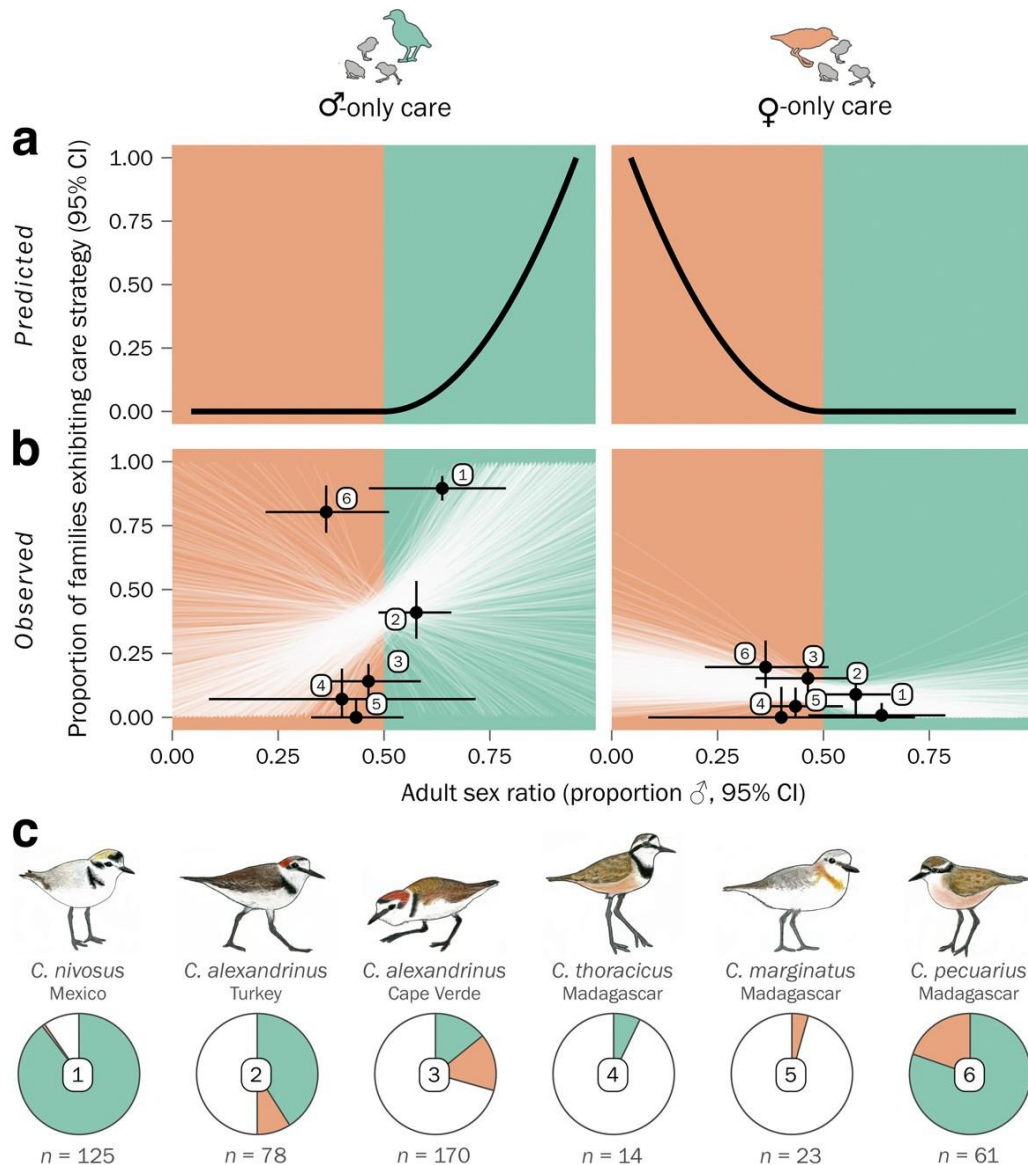

**Supplementary Figure 3. Relationship between uni-parental care and the adult sex ratio.** (a) Predicted prevalence of male-only care (left panel) or female-only care (right panel) in response to adult sex ratio variation. (b) Observed relationship between parental care strategies and adult sex ratio estimates among the six studied populations. Faint white lines illustrate each iteration of the bootstrap, which randomly sampled an adult sex ratio and parental care estimate from each population's uncertainty distribution and fitted them to the *a priori* exponential model (Eq. 11). (c) Proportion of monitored plover families that exhibit parental cooperation (white) or uni-parental care by males (green) or females (orange).



Sample sizes reflect the number of families monitored per population, circled numbers correspond to the data point labels shown in panel (b). Original plover illustrations and silhouettes by L.J.E-P.

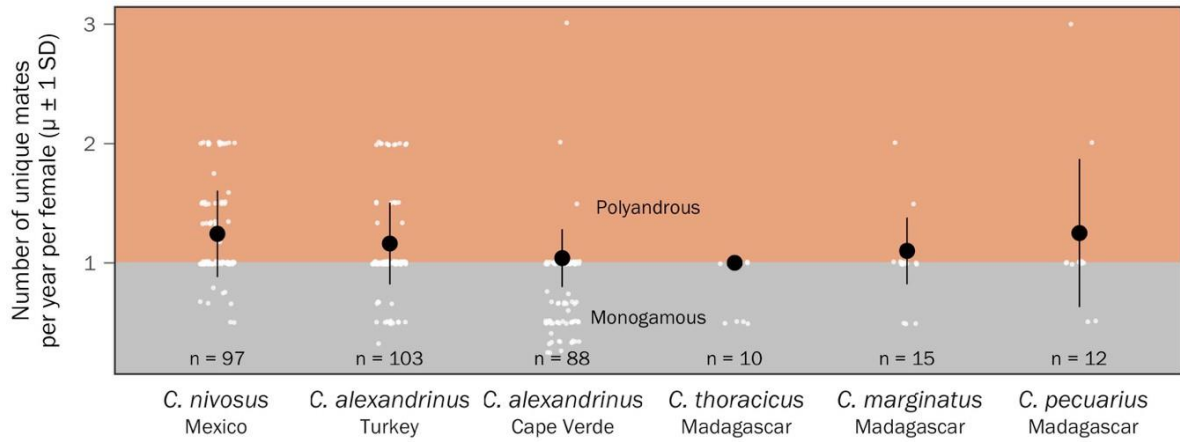

**Supplementary Figure 4. Variation in annual female mating rates ( $\mu$ ) among the six plover populations.** Sample sizes indicate the number of individual females in each population that had at least two recorded breeding attempts with identified male(s) during the study. Values below one represent females that bred over multiple years with the same mate (i.e. long-term monogamy), whereas values greater than one represent females that have had more than one mate per year (i.e. within season polyandry). Values equal to one represent individuals that have had one mate per year, but have switched mates between years (i.e. between season polyandry but within season monogamy). White data points illustrate individual females' mates per year (i.e.  $m_i / b_i$  in Eq. 5), and black points are population averages corrected for long-term monogamy according to Eq. 5 ( $\mu \pm 1$  SD).



## Supplementary References

1. Parra, J. E., Beltrán, M., Zefania, S., Remedios, dos, N. & Székely, T. Experimental assessment of mating opportunities in three shorebird species. *Anim. Behav.* **90**, 83–90 (2014).
