# Supplementary material for: Demographic causes of adult sex ratio variation and their consequences for parental cooperation
Source: PubMed Central journal article supplement (PMC5917032; doi:10.1038/s41467-018-03833-5), 2018-04-25
Supplement: 41467_2018_3833_MOESM3_ESM.pdf [file 41467_2018_3833_MOESM3_ESM.pdf]

## Description of Additional Supplementary Files

Supplementary Movie 1. **Field methods for capturing and monitoring plovers.** A movie illustrating our field methods for studying plovers in the wild.

Supplementary Data 1. .Rmd file needed to reproduce all our modelling and statistical analysis in R.
